# Supplementary material
Source: HighWire-hosted journal article supplement (http://rc.rcjournal.com/highwire/filestream/25716/field_highwire_adjunct_files/2/rc-10925-File006.docx)
Supplement: rc-10925-File006.docx [file rc-10925-File006.docx]

**Supplemental Table 2. Association between first post-transplant spirometry and diffusing capacity measures and non-relapse mortality at 1 and 2 years after HCT**

| PFT parameter | Variable | 1-year mortality | | p-value | 2-year mortality | | p-value |
| --- | --- | --- | --- | --- | --- | --- | --- |
| OR | 95% CI |  | OR | 95% CI |  |
| Forced Expiratory Volume in 1 second (FEV1) | Pre-transplant | 0.60 | 0.49, 0.73 | <0.001 | 0.56 | 0.47, 0.67 | <0.001 |
| First post-Tx PFT | 0.53 | 0.40, 0.69 | <0.001 | 0.50 | 0.40, 0.62 | <0.001 |
| 10% decline in first year† | 1.54 | 0.92, 2.51 | 0.087 | 1.31 | 0.84, 2.00 | 0.2 |
| 20% decline in first year† | 3.02 | 1.54, 5.64 | <0.001 | 3.07 | 1.68, 5.52 | <0.001 |
| Forced Vital Capacity (FVC) | Pre-transplant | 0.69 | 0.60, 0.80 | <0.001 | 0.68 | 0.59, 0.78 | <0.001 |
| First post-Tx PFT | 0.61 | 0.49, 0.76 | <0.001 | 0.60 | 0.49, 0.71 | <0.001 |
| 10% decline in first year‡ | 1.73 | 1.06, 2.78 | 0.025 | 1.62 | 1.07, 2.43 | 0.021 |
| 20% decline in first year‡ | 2.75 | 1.35, 5.28 | 0.003 | 3.21 | 1.74, 5.82 | <0.001 |
| Diffusing Capacity for Carbon Monoxide (DLCO) | Pre-transplant | 0.94 | 0.91, 0.96 | <0.001 | 0.93 | 0.91, 0.95 | <0.001 |
| First post-Tx PFT | 0.92 | 0.88, 0.96 | <0.001 | 0.90 | 0.86, 0.93 | <0.001 |
| 10% decline in first year§ | 1.51 | 0.96, 2.38 | 0.073 | 1.73 | 1.18, 2.53 | 0.005 |
| 20% decline in first year§ | 3.16 | 1.86, 5.31 | <0.001 | 2.91 | 1.82, 4.62 | <0.001 |

† Adjusted for pre-transplant FEV1.  ‡ Adjusted for pre-transplant FVC.
§ Adjusted for pre-transplant DLCO.
For pre-transplant and first post-transplant FVC and FEV1, ORs correspond to mortality risk per liter of the corresponding spirometry value. For pre-transplant and first post-transplant DLCO, ORs correspond mortality risk per mL/min/mmHg.
